# Supplementary material
Source: PubMed Central journal article supplement (PMC9675037)

Supplemental Figure 1. Relapse by Conditioning Intensity

RIC vs. MAC

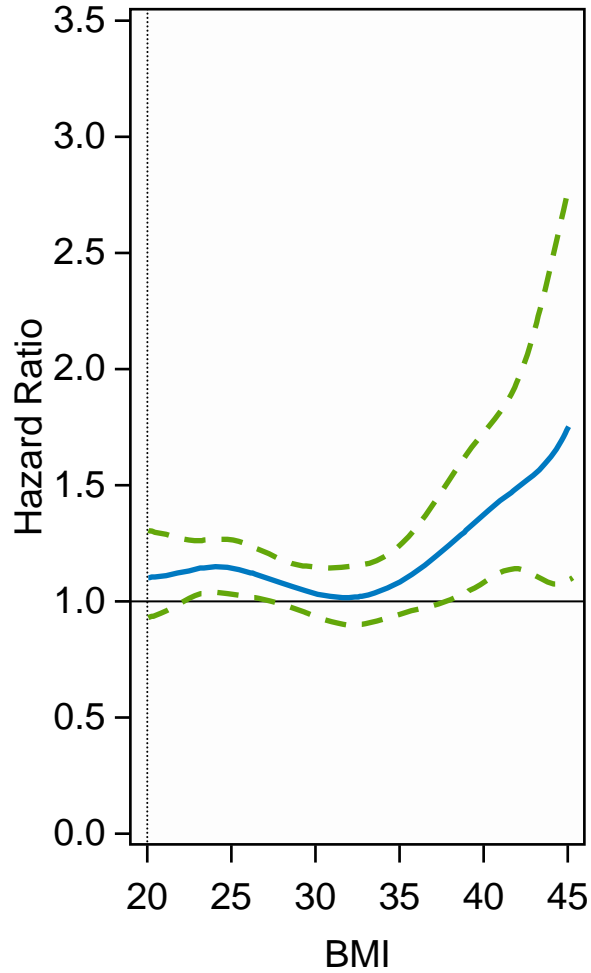

NMA vs. MAC

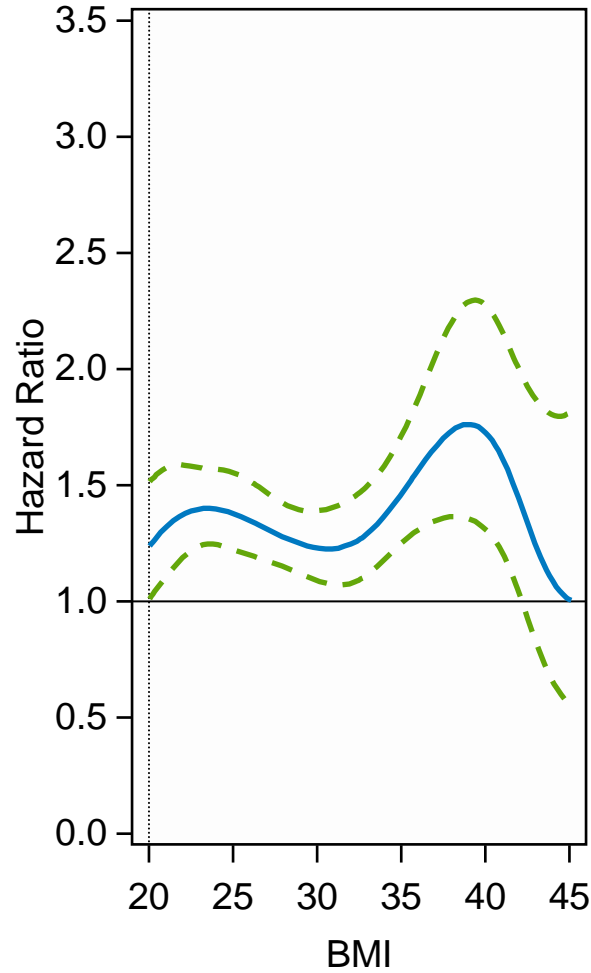

NMA vs. RIC

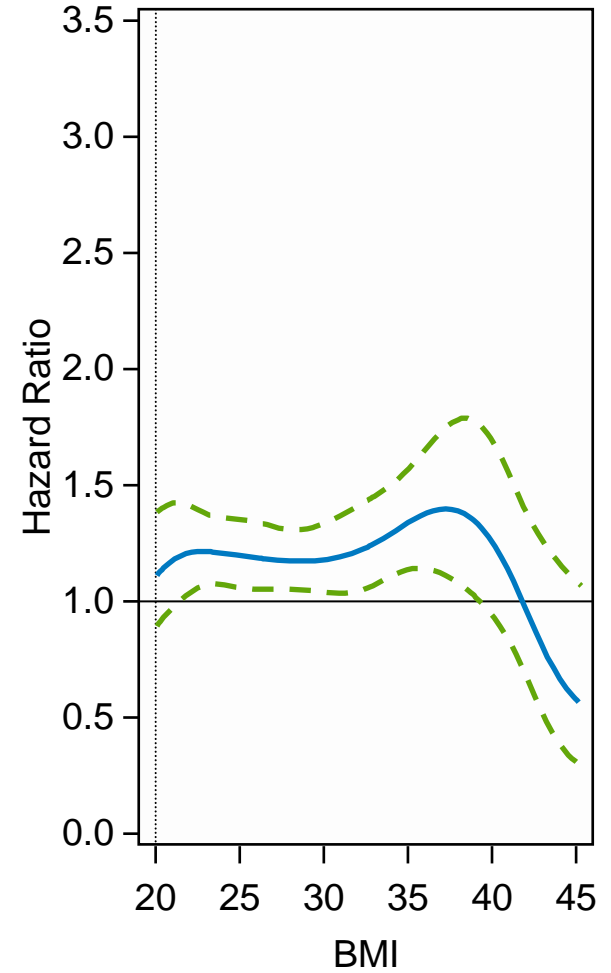

Supplement: NIHMS1839600-supplement-2.pdf [file NIHMS1839600-supplement-2.pdf]
